# Supplementary material for: A Higher Adherence to the ALINFA Nutritional Intervention Is Effective for Improving Dietary Patterns in Children
Source: MDPI journal article supplement (doi:10.3390/children11050559), 2024-05-07
Supplement: s1 [file s1]

## **SUPPLEMENTARY MATERIAL**

**Table S1: ALINFA DIET**

| <i>Week 1</i>            | <b>DAY 1</b>                                                                                                                 | <b>DAY 2</b>                                                                                                                                                   | <b>DAY 3</b>                                                                                                                | <b>DAY 4</b>                                                                                                                                   | <b>DAY 5</b>                                                                                                               | <b>DAY 6</b>                                                                                                                                            | <b>DAY 7</b>                                                                                                               |
|--------------------------|------------------------------------------------------------------------------------------------------------------------------|----------------------------------------------------------------------------------------------------------------------------------------------------------------|-----------------------------------------------------------------------------------------------------------------------------|------------------------------------------------------------------------------------------------------------------------------------------------|----------------------------------------------------------------------------------------------------------------------------|---------------------------------------------------------------------------------------------------------------------------------------------------------|----------------------------------------------------------------------------------------------------------------------------|
| <i>BREAKFAST</i>         | 1 glass of whole milk (200 ml) with 1 tablespoon of soluble cocoa (10 g)<br><br>Breakfast cereals (30g)<br><br>Orange (150g) | 1 glass of whole milk (200 ml) with 1 tablespoon of soluble cocoa (10 g)<br><br>1 whole wheat toast (30 g)<br><br>Banana (80g)                                 | 1 glass of whole milk (200 ml) with 1 tablespoon of soluble cocoa (10 g)<br><br>Breakfast cereals (30g)<br><br>Apple (150g) | 1 glass of whole milk (200 ml) with 1 tablespoon of soluble cocoa (10 g)<br><br>1 whole wheat toast (30 g)<br><br>Tangerine (150g)             | 1 glass of whole milk (200 ml) with 1 tablespoon of soluble cocoa (10 g)<br><br>Breakfast cereals (30g)<br><br>Kiwi (150g) | 1 glass of whole milk (200 ml) with 1 tablespoon of soluble cocoa (10 g)<br><br>1 whole wheat toast (30 g)<br><br>Orange (150g)                         | 1 glass of whole milk (200 ml) with 1 tablespoon of soluble cocoa (10 g)<br><br>Breakfast cereals (30g)<br><br>Pear (150g) |
| <i>MID-MORNING SNACK</i> | <b>Snack: Rice, corn and peas with olive oil</b> (1 portion)<br><br>1 handful of pistachios (15 g)                           | Tangerine (150g)<br><br>1 handful of walnuts (15 g)                                                                                                            | 1 small sandwich of whole wheat bread (45 g) with ham (40 g)                                                                | Banana (80g)<br><br>1 handful of hazelnuts (15 g)                                                                                              | 1 small sandwich of whole wheat bread (45 g) with ham (20 g) and sliced cheese (20 g)                                      | <b>Snack: Rice, corn and fruit with olive oil</b> (1 portion)<br><br>Tangerine (150g)                                                                   | 1 banana (80g)<br><br>1 handful of almonds (15 g)                                                                          |
| <i>LUNCH</i>             | <b>Green beans with potato</b> (1 portion)<br><br><b>Lentils with carrot</b> (1 portion)<br><br>Apple (150g)                 | <b>Lettuce, corn and ham salad</b> (1 portion)<br><br><b>Asparagus and turkey burrito</b> (1 portion)<br><br>1 natural yogurt with <b>fibre topping</b> (10 g) | <b>Chard with serrano ham</b> (1 portion)<br><br><b>Cod with zucchini vichyssoise</b> (1 portion)<br><br>Orange (150g)      | <b>Zucchini spaghetti</b> (1 portion)<br><br><b>Black bean burger</b> (1 portion)<br><br>1 natural yogurt with <b>red fruit topping</b> (10 g) | <b>Macaroni with vegetables</b> (1 portion)<br><br><b>Gratinéed hake in dill sauce</b> (1 portion)<br><br>Pear (150g)      | <b>Steamed artichokes</b> (1 portion)<br><br><b>Borage pancakes with mushrooms</b> (1 portion)<br><br>1 natural yogurt with <b>fruit topping</b> (10 g) | <b>Oatmeal paella</b> (1 portion)<br><br><b>Flexynuggets</b> (1 portion)<br><br>Orange (150g)                              |
| <i>AFTERNOON SNACK</i>   | 1 natural yogurt with <b>red fruit topping</b> (10 g)<br><br>Kiwi (150g)                                                     | 1 small sandwich of whole wheat bread (45 g) and sliced cheese (40 g)                                                                                          | 1 natural yogurt with <b>fruit topping</b> (10 g)<br><br>Banana (80g)                                                       | 1 small sandwich of whole wheat bread (45 g) with serrano ham (40 g)                                                                           | 1 natural yogurt with <b>fibre topping</b> (10 g)<br><br>Strawberries (150g)                                               | 1 small toast of whole wheat bread (45 g) with tomato and fresh cheese (60 g)                                                                           | 1 toast of whole wheat bread (45 g) with cottage cheese <b>Nutella</b>                                                     |

DINNER

|                                                                                                                      |                                                                                |                                                                                                             |                                             |                                                                                          |                                                                      |                                                                                                       |
|----------------------------------------------------------------------------------------------------------------------|--------------------------------------------------------------------------------|-------------------------------------------------------------------------------------------------------------|---------------------------------------------|------------------------------------------------------------------------------------------|----------------------------------------------------------------------|-------------------------------------------------------------------------------------------------------|
|                                                                                                                      |                                                                                |                                                                                                             |                                             |                                                                                          |                                                                      | cocoa and nuts (1 portion)                                                                            |
| Vegetable flan with cheese and oregano with tomato garnish (1 portion)<br>1 natural yogurt with fibre topping (10 g) | Battered hake in oatmeal popcorn and zucchini cream (1 portion)<br>Pear (150g) | Chicken wok with vegetables, curry and white rice (1 portion)<br>1 natural yogurt with fibre topping (10 g) | Baked dumplings (1 portion)<br>Apple (150g) | Cabbage omelette with peas (1 portion)<br>1 natural yogurt with red fruit topping (10 g) | Grilled pork tenderloin with french fries (1 portion)<br>Pear (150g) | Chickpea meatballs with tuna and tomato (1 portion)<br>1 natural yogurt with red fruit topping (10 g) |

| Week 2                   | DAY 1                                                                                                                                                                    | DAY 2                                                                                                                 | DAY 3                                                                                                                                                            | DAY 4                                                                                                               | DAY 5                                                                                                                   | DAY 6                                                                                                                        | DAY 7                                                                                                                        |
|--------------------------|--------------------------------------------------------------------------------------------------------------------------------------------------------------------------|-----------------------------------------------------------------------------------------------------------------------|------------------------------------------------------------------------------------------------------------------------------------------------------------------|---------------------------------------------------------------------------------------------------------------------|-------------------------------------------------------------------------------------------------------------------------|------------------------------------------------------------------------------------------------------------------------------|------------------------------------------------------------------------------------------------------------------------------|
| <b>BREAKFAST</b>         | 1 glass of whole milk (200 ml) with 1 tablespoon of soluble cocoa (10 g)<br>1 whole wheat toast (30 g)<br>Kiwi (150g)                                                    | 1 glass of whole milk (200 ml) with 1 tablespoon of soluble cocoa (10 g)<br>Breakfast cereals (30g)<br>1 banana (80g) | 1 glass of whole milk (200 ml) with 1 tablespoon of soluble cocoa (10 g)<br>1 whole wheat toast (30 g)<br>Pear (150g)                                            | 1 glass of whole milk (200 ml) with 1 tablespoon of soluble cocoa (10 g)<br>Breakfast cereals (30g)<br>Apple (150g) | 1 glass of whole milk (200 ml) with 1 tablespoon of soluble cocoa (10 g)<br>1 whole wheat toast (30 g)<br>Orange (150g) | 1 glass of whole milk (200 ml) with 1 tablespoon of soluble cocoa (10 g)<br>Breakfast cereals (30g)<br>Kiwi (150g)           | 1 glass of whole milk (200 ml) with 1 tablespoon of soluble cocoa (10 g)<br>1 whole wheat toast (30 g)<br>Tangerine (150g)   |
| <b>MID-MORNING SNACK</b> | <b>Snack: Rice, corn and peas with olive oil</b> (1 portion)<br>Tangerine (150g)                                                                                         | 1 small sandwich of whole wheat bread (45 g) with ham (40 g)                                                          | 1 small sandwich of whole wheat bread (45 g) with serrano ham (40 g)                                                                                             | Tangerine (150g)<br>1 handful of cashews (15 g)                                                                     | <b>Snack: Rice, corn and fruits with olive oil</b> (1 portion)<br>Apple (150g)                                          | Banana (80g)<br>1 small sandwich of whole wheat bread (30 g) and ham (20 g)                                                  | Apple (150g)<br>1 small sandwich of whole wheat bread (30 g) and ham (20 g)                                                  |
| <b>LUNCH</b>             | <b>Lettuce salad, carrot strips and green olives</b> (1 portion)<br><b>Chickpeas, curry and spinach</b> (1 portion)<br>1 natural yogurt with <b>fibre topping</b> (10 g) | <b>Gratinéed cauliflower</b> (1 portion)<br><b>Battered pomfret in tomato sauce</b> (1 portion)<br>Apple (150g)       | <b>Tomato and fresh cheese salad</b> (1 portion)<br><b>Lentils with pumpkin and chicken</b> (1 portion)<br>1 natural yogurt with <b>red fruit topping</b> (10 g) | <b>Milanese rice</b> (1 portion)<br><b>Vegetable omelette</b> (1 portion)<br>Pear (150g)                            | <b>Vegetable stew</b> (1 portion)<br><b>Flexiballs</b> (1 portion)<br>1 natural yogurt with <b>fibre topping</b> (10 g) | <b>Spaghetti with tomato sauce and vegetables</b> (1 portion)<br><b>Baked cod with lemon</b> (1 portion)<br>Tangerine (150g) | <b>Zucchini cream</b> (1 portion)<br><b>Flexiburger</b> (1 portion)<br>1 natural yogurt with <b>red fruit topping</b> (10 g) |
| <b>AFTERNOON SNACK</b>   | 1 small sandwich of whole wheat bread (45 g) with serrano ham (40 g)                                                                                                     | 1 natural yogurt with <b>fruit topping</b> (10 g)<br>Strawberries (150g)                                              | Apple (150g)<br>1 handful of walnuts (15 g)                                                                                                                      | 1 small sandwich of whole wheat bread (45 g) with sliced cheese (40 g)                                              | 1 handful of hazelnuts (15 g)<br>Tangerine (150g)                                                                       | 1 small toast of whole wheat bread (45 g) with tomato and goat cheese (40 g)                                                 | 1 glass of whole milk (150 ml)<br><b>Beet brownie</b> (1 portion)                                                            |
| <b>DINNER</b>            | <b>Green bean, smoked salmon, sesame, walnut and fruit salad</b> (1 portion)                                                                                             | <b>Pork loin in apple sauce with white rice</b> (1 portion)                                                           | <b>Vegetables with pasta</b> (1 portion)<br>Orange (150g)                                                                                                        | <b>Chicken schnitzel with baby carrots</b> (1 portion)                                                              | <b>Baked sweet potato stuffed with egg and melted cheese</b> (1 portion)                                                | <b>Ham omelette with tomato sauce and vegetables</b> (1 portion)                                                             | <b>Oatmeal and pumpkin broth rice</b> (1 portion)<br>Banana (80g)                                                            |

|             |                                               |                                               |              |                                               |
|-------------|-----------------------------------------------|-----------------------------------------------|--------------|-----------------------------------------------|
| Pear (150g) | 1 natural yogurt with<br>fibre topping (10 g) | 1 natural yogurt with<br>fruit topping (10 g) | Banana (80g) | 1 natural yogurt with<br>fruit topping (10 g) |
|-------------|-----------------------------------------------|-----------------------------------------------|--------------|-----------------------------------------------|

\* Daily 1 portion of whole wheat bread (30 g) at lunch and dinner.

Company products

Ready-to-eat dishes

Recipes to make at home

**Table S2: NUTRITIONAL INFORMATION OF ALINFA DIET**

|               | AMDR          | Younger age group       | Older age group      |
|---------------|---------------|-------------------------|----------------------|
| Carbohydrates | <b>45-65%</b> | 205.00 g <b>(48.5%)</b> | 227 g <b>(49%)</b>   |
| Protein       | <b>10-30%</b> | 83.00 g <b>(19.5%)</b>  | 91.00 g <b>(19%)</b> |
| Lipids        | <b>25-35%</b> | 60.00 g <b>(32%)</b>    | 66.00 g <b>(32%)</b> |
| SFA           |               | 19.40 g <b>(10%)</b>    | 21.15 g <b>(10%)</b> |
| MUFA          |               | 28.75 g <b>(15%)</b>    | 33.30 g <b>(16%)</b> |
| PUFA          |               | 11.40 g <b>(6%)</b>     | 13.10 g <b>(6%)</b>  |
| Fibre         |               | 31.50 g                 | 33.50 g              |
| Sugar         |               | 87.90 g                 | 91.10 g              |
| Iron          |               | 12.35 mg                | 13.70 mg             |
| Calcium       |               | 912.35 mg               | 967.00 mg            |
| Sodium        |               | 2542.90 mg              | 2785.30 mg           |
| Vitamin D     |               | 3.90 µg                 | 4.20 µg              |

Note: AMDR=Acceptable Macronutrient Distribution Ranges; SFA= saturated fatty acids; MUFA= monounsaturated fatty acids; PUFA= polyunsaturated fatty acids.

**TABLE S3: FOOD PRODUCTS, READY-TO-EAT DISHES AND RECIPES**

| Industry               | Dish                | Ingredients                                                                              |
|------------------------|---------------------|------------------------------------------------------------------------------------------|
| <b>GRUPO APEX S.A.</b> | ▪ Snack 1           | <i>Rice, corn and peas flour, olive oil</i>                                              |
|                        | ▪ Snack 2           | <i>Rice and corn flour, banana, orange and hawthorn dehydrated berry, olive oil</i>      |
| <b>Harivenasa S.L</b>  | ▪ Red fruit topping | <i>Oat flakes, pumpkin seeds, blueberries, goji berries, cherries, strawberries</i>      |
|                        | ▪ Fibre topping     | <i>Oat flakes, pumpkin seeds, sunflower seeds, golden linseeds, brown linseeds, kiwi</i> |

|                                                 |                                 |                                                                                                                                                             |
|-------------------------------------------------|---------------------------------|-------------------------------------------------------------------------------------------------------------------------------------------------------------|
| <b>Alimentos Sanygran S.L</b>                   | ▪ Fruit topping                 | <i>Oat flakes, sunflower seeds, pumpkin seeds, blueberries, pineapple, apple, goji berries, cherries</i>                                                    |
|                                                 | ▪ Flexinuggets                  | <i>Chicken, hydrated vegetable extruded (soy, rice and bean flours), salt, spices, tomato and beet powder</i>                                               |
|                                                 | ▪ Flexiballs                    | <i>Hydrated vegetable extruded (soy, rice and bean flour), beef, soy protein, salt, soy sauce, spices, beet powder, wheat flour, sunflower oil</i>          |
|                                                 | ▪ Flexiburgers                  | <i>Hydrated vegetable extruded (soy, rice and bean flour), beef, soy protein, salt, soy sauce, onion, garlic, beet powder</i>                               |
| <b>Industrias Alimentarias de Navarra S.A.U</b> | ▪ Oatmeal paella                | <i>Oat, braised chicken breast, pea, sweet corn, green bean, soybeans, olive oil, red bean, sunflower seeds, onion, salt, saffron extract, soy lecithin</i> |
|                                                 | ▪ Vegetable stew                | <i>Green beans, artichokes, carrot, mushroom, olive oil, salt</i>                                                                                           |
|                                                 | ▪ Vegetables with pasta         | <i>Pasta, tomato, green bean, zucchini, onion, olive oil, green and red pepper, orange rind, sugar, salt</i>                                                |
| <b>Irigoyen Comedor Saludable S.L.</b>          | ▪ Green beans with potato       | <i>Green beans, potato, olive oil, garlic, salt</i>                                                                                                         |
|                                                 | ▪ Lentils with carrot           | <i>Lentils, tomato, onion, carrot, red and green pepper, olive oil, garlic, salt</i>                                                                        |
|                                                 | ▪ Vegetable flan                | <i>Pasteurized egg, zucchini, potato, emmental cheese, carrot, red and green pepper, onion, tomato, olive oil, salt, oregano</i>                            |
|                                                 | ▪ Chard with serrano ham        | <i>Chard, serrano ham, olive oil, garlic, salt</i>                                                                                                          |
|                                                 | ▪ Cod with zucchini vichyssoise | <i>Cod, potato, zucchini, breadcrumbs, butter, olive oil, salt</i>                                                                                          |
|                                                 | ▪ Chicken wok with vegetables   | <i>Chicken, red and green pepper, carrot, onion, potato, vinegar, olive oil, salt</i>                                                                       |
|                                                 | ▪ Macaroni with vegetables      | <i>Pasta, broccoli, pumpkin, red/green pepper, olive oil, salt</i>                                                                                          |
|                                                 |                                 |                                                                                                                                                             |

**National  
Center for  
Technology  
and Food  
Safety**

- Gratinated hake in dill sauce *Hake, whole milk, onion, leek, yolk, corn flour, olive oil, dill, salt*
- Cabbage omelette with peas *Cabbage, pasteurized egg, potato, peas, olive oil and salt*
- Gratineed cauliflower *Cauliflower, wheat flour, butter, emmental cheese and white pepper and salt*
- Battered pomfret in tomato sauce *Pomfret, tomato sauce, olive oil, wheat flour, pasteurized egg, red/green pepper, onion, garlic, salt, oregano*
- Pork loin in apple sauce with rice *Pork, onion, apple, olive oil, vinegar, ginger, salt*
- Milanese rice *Rice, carrot, mushroom, raisins, emmental cheese, olive oil, oregano, salt*
- Vegetable omelette *Pasteurized egg, red/green pepper, zucchini, carrot, olive oil, salt*
- Chicken schnitzel with baby carrots *Chicken, carrot, olive oil, garlic, salt*
- Asparagus and turkey burrito *Asparagus, turkey breast, mozzarella cheese, wheat wafers, soy sauce*
- Zucchini spaghetti *Zucchini, pistachios, garlic, tomato, parmesan cheese, olive oil, salt*
- Bean, coco and beetroot burger *Beans, beetroot, onion, mushrooms, oat flakes, coconut, pepper, parsley, olive oil, salt*
- Steamed artichokes *Artichokes, lemon, pepper, cooking cream, olive oil, salt*
- Oatmeal crepes with mushrooms, borage and veal *Veal, mushrooms, borage, onion, carrot, tomato, flour, eggs, oat milk, butter, sugar, salt*
- Hake battered in oats and zucchini *Hake, wheat flour, eggs, oat flakes, zucchini, carrots, cheese, milk, salt*
- Zucchini cream *Zucchini, potato, cheese, olive oil, salt*
- Baked pasties *Prawns, pork, garlic, carrot, egg, patty wafers, olive oil, salt*



- Chickpea meatballs with tuna and tomatoes *Tuna, chickpeas, chickpea flour, tomato, onion, carrot, garlic, parsley, sweet paprika, pepper, olive oil, salt*
- Chickpeas with curry and spinach *Chickpeas, onion, spinach, tomato, ginger, garlic, turmeric, olive oil, salt*
- Lentils with pumpkin and chicken *Lentils, chicken breast, pumpkin, onion, sweet paprika, olive oil, salt*
- Baked sweet potato with eggs *Sweet potato, leek, onions, mozzarella cheese, thyme, eggs, olive oil, salt*
- Fake pumpkin and oatmeal rice stew *Oat groats, onion, carrot, leek, pumpkin, celery, hake, bread, tomato, butter, parsley wine, olive oil, salt*
- Ham omelette with vegetables *Eggs, ham, tomato, onion, red and green pepper, zucchini, olive oil, salt*
- Grilled pork with french fries *Pork tenderloin, potato, olive oil, salt*
- Vegetable and tomato spaghetti *Spaghetti, onion, carrot, red pepper, zucchini, tomato sauce, olive oil, salt*
- Salad 1 *Tomato, soft cheese, olive oil, salt*
- Salad 2 *Lettuce, carrot, green olives, olive oil, salt.*
- Salad 3 *Green beans, salmon, sesame, walnuts, orange, pita bread, olive oil, salt*
- Salad 4 *Lettuce, corn, ham, olive oil, salt*
- Baked cod *Cod, lemon, olive oil, salt.*
- Beetroot brownie *Beetroot, butter, chocolate, eggs, oat flour, cocoa and baking powder, salt*
- Cottage cheese, cocoa and nuts cream *Cottage cheese, cocoa powder, almond powder, hazelnuts, honey*
